# Supplementary material for: Ruthenium–nickel heterobimetallic complex as a bifunctional catalyst for ROMP of norbornene and ethylene polymerization
Source: Royal Society of Chemistry journal article supplement (doi:10.1039/d1nj01498f), 2021-01-01
Supplement: d1nj01498f1.pdf [file d1nj01498f1.pdf]

SUPPLEMENTARY INFORMATION

Ruthenium-nickel heterobimetallic complex as a bifunctional catalyst for  
ROMP of norbornene and ethylene polymerization

Gustavo H. C. Masson<sup>a</sup>, Thaís R. Cruz<sup>a</sup>, Patrik D. S. Gois<sup>a</sup>, Daniele M. Martins<sup>b</sup>,  
Benedito, S. Lima-Neto<sup>b</sup>, Guedmiller S. Oliveira<sup>c</sup>, Antonio E. H. Machado<sup>c</sup>, Katia  
Bernardo-Gusmão<sup>d</sup>, Beatriz E. Goi<sup>a</sup>, Valdemiro P. Carvalho-Jr<sup>a\*</sup>

*<sup>a</sup>Faculdade de Ciências e Tecnologia, UNESP – Univ. Estadual Paulista, CEP 19060-900, Presidente Prudente, SP, Brazil*

*<sup>b</sup>Instituto de Química de São Carlos, Universidade de São Paulo, CEP 13560-970, São Carlos, SP, Brazil*

*<sup>c</sup>Instituto de Química, Universidade Federal de Uberlândia, P.O. Box 593, CEP 38400-089, Uberlândia, MG, Brazil*

*<sup>d</sup>Instituto de Química, Universidade Federal do Rio Grande do Sul, P.O. Box 15003, CEP 91501-970, Porto Alegre, RS, Brazil*

Correspondence to: Valdemiro P. Carvalho-Jr (E-mail: [valdemiro.carvalho@unesp.br](mailto:valdemiro.carvalho@unesp.br))

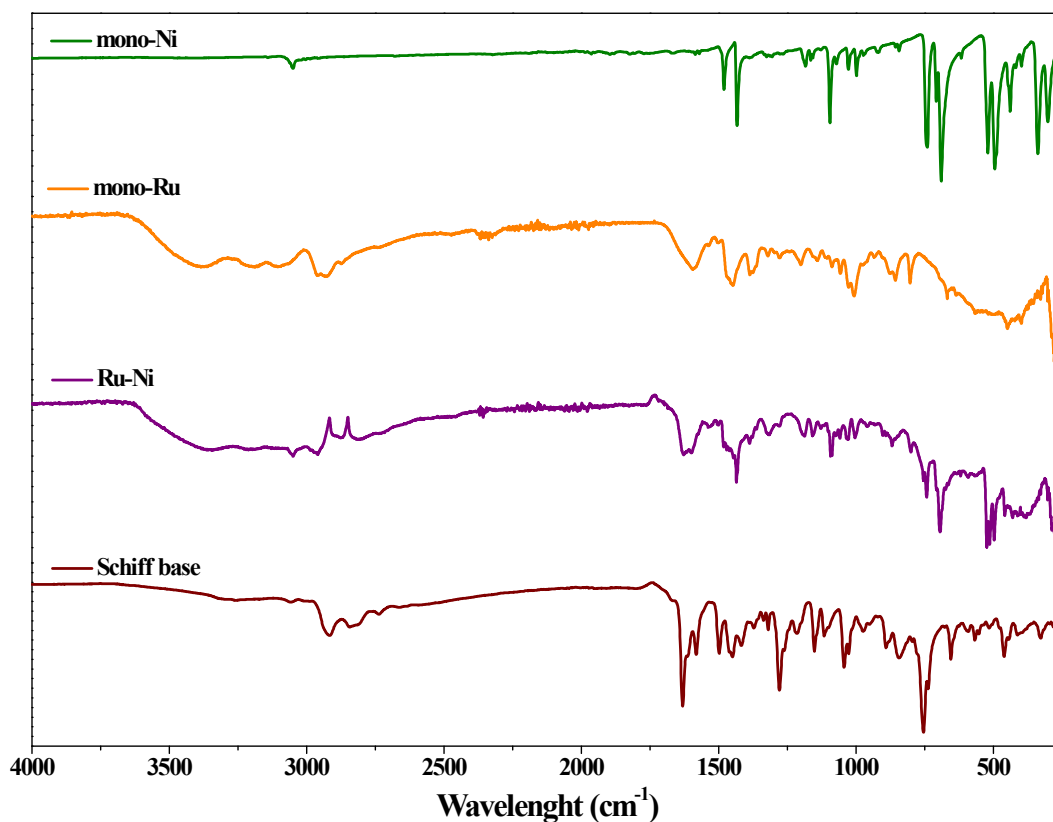

**Fig. S1.** FTIR spectra of Schiff base, **mono-Ru**, **mono-Ni**, and **Ru-Ni**.

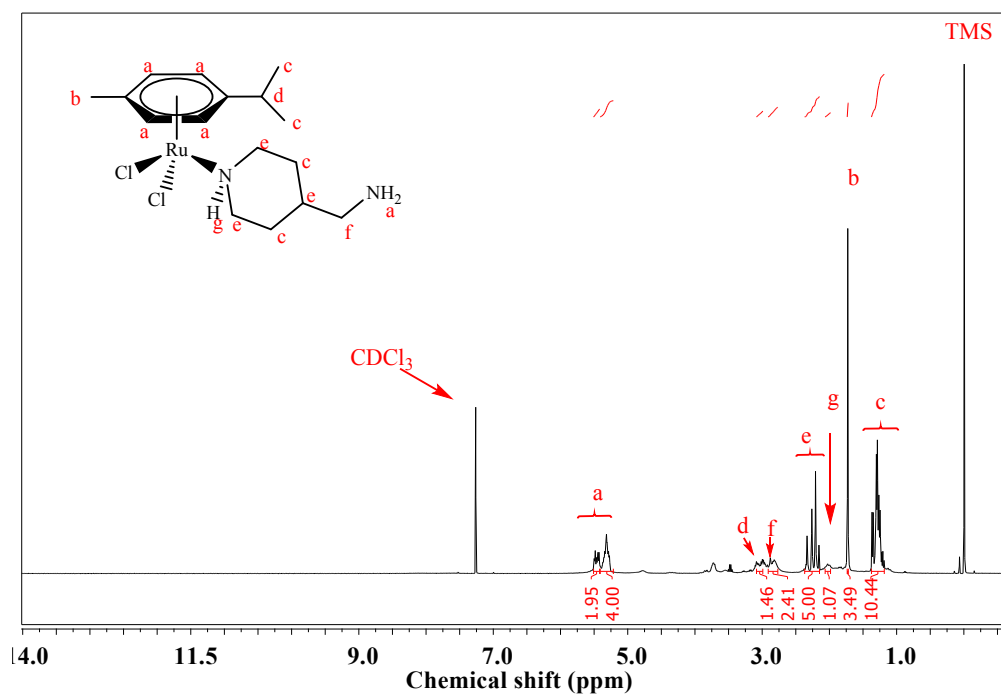

**Fig. S2.** <sup>1</sup>H NMR spectra of **mono-Ru** from CDCl<sub>3</sub> solutions ( $\delta$  in ppm).

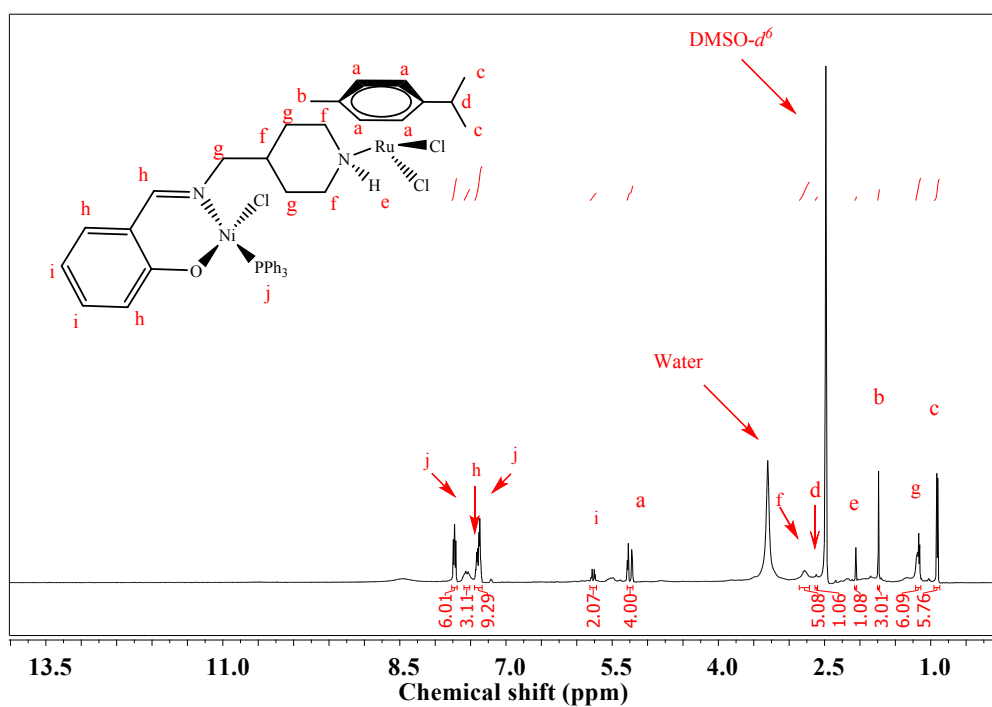

**Fig. S3.**  $^1\text{H}$  NMR spectra of Ru-Ni from DMSO- $d_6$  solutions ( $\delta$  in ppm).

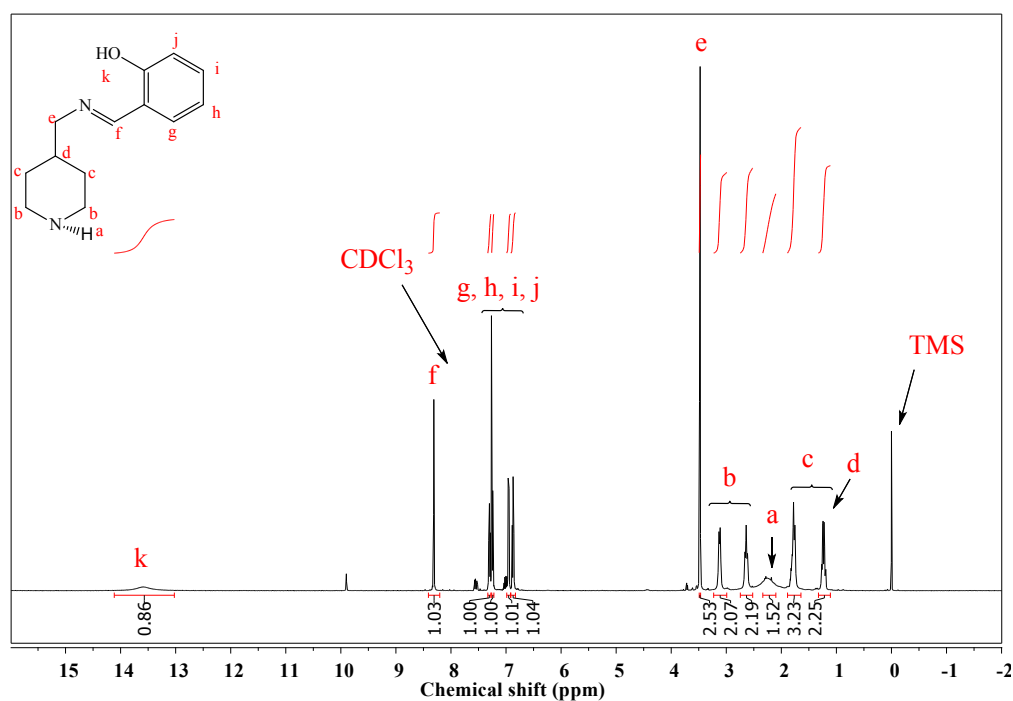

**Fig. S4.**  $^1\text{H}$  NMR spectra of Schiff-pip from CDCl<sub>3</sub> solutions ( $\delta$  in ppm).

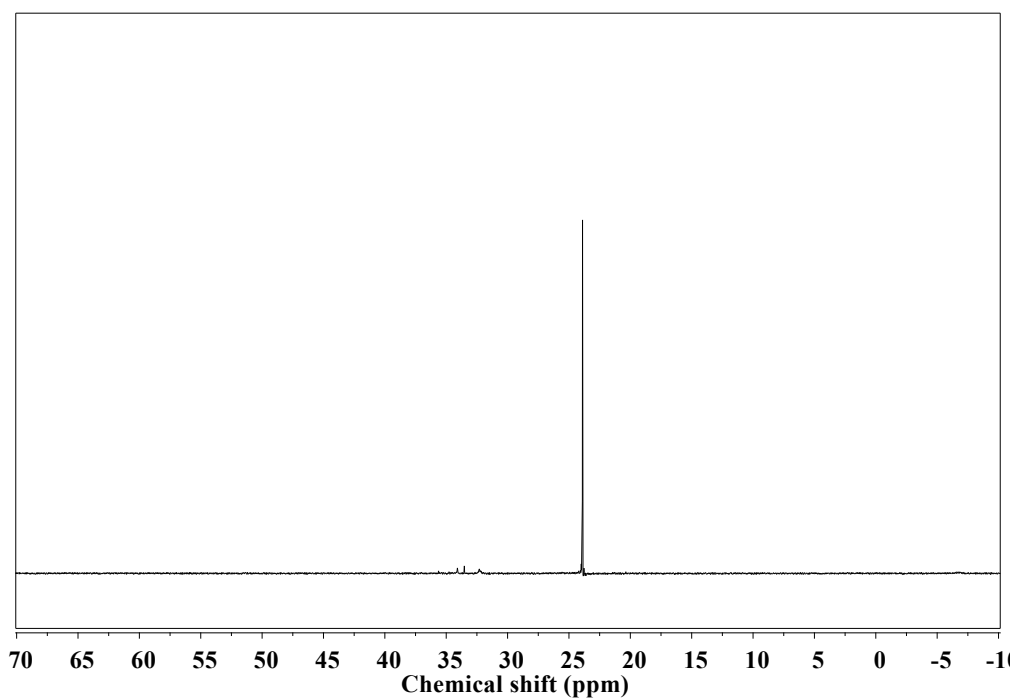

**Fig. S5.**  $^{31}\text{P}$  { $^1\text{H}$ } NMR spectra of **Ru-Ni** from  $\text{DMSO-}d^6$  solutions ( $\delta$  in ppm).

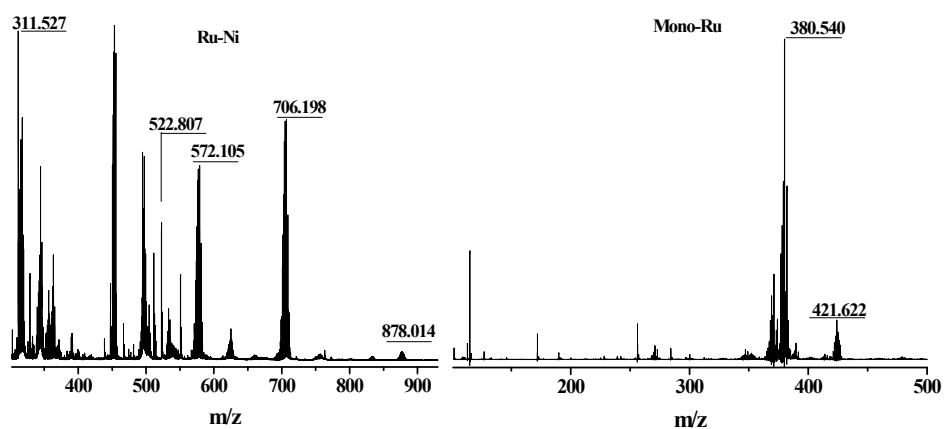

**Fig. S6.** MALDI-TOF spectrum of **Ru-Ni** and **mono-Ru** in MeOH.

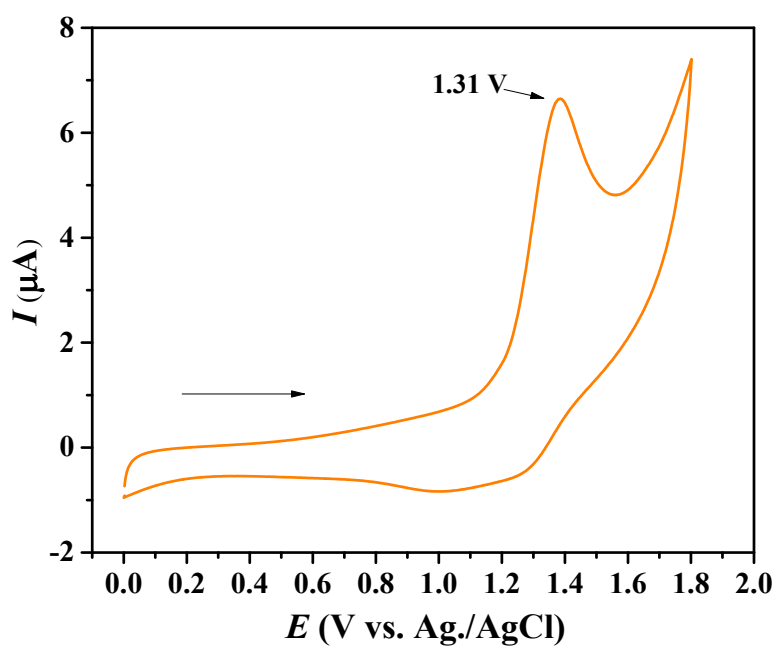

**Fig. S7.** Cyclic voltammogram of **mono-Ru** at  $1.0 \cdot 10^{-3}$  M and  $n\text{-Bu}_4\text{NPF}_6/\text{CH}_2\text{Cl}_2$  0.1 M vs. Ag/AgCl; obtained at  $100 \text{ mV} \cdot \text{s}^{-1}$ .

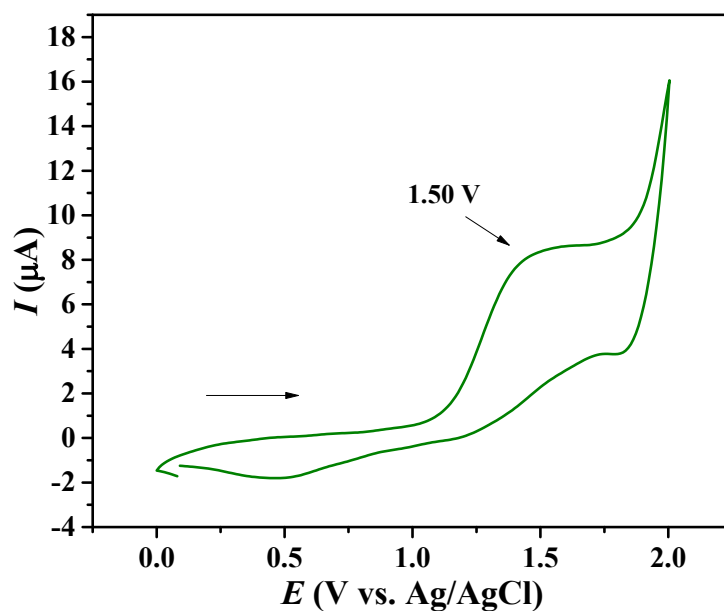

**Fig. S8.** Cyclic voltammogram of **mono-Ni** at  $1.0 \cdot 10^{-3}$  M and  $n\text{-Bu}_4\text{NPF}_6/\text{CH}_2\text{Cl}_2$  0.1 M vs. Ag/AgCl; scanning anodically from 0.8 up to 1.6 V at  $100 \text{ mV} \cdot \text{s}^{-1}$ .

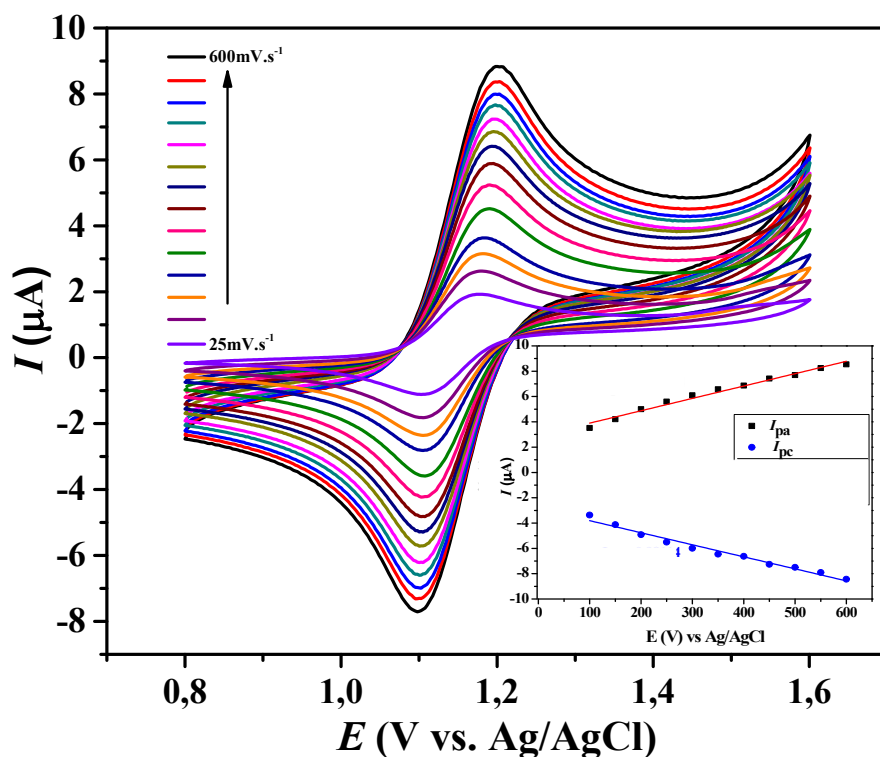

**Fig. S9.** Cyclic voltammogram of **Ru-Ni** at  $1.0 \cdot 10^{-3}$  M and  $n\text{-Bu}_4\text{NPF}_6/\text{CH}_2\text{Cl}_2$  0.1 M vs. Ag/AgCl; scanning anodically from 0.8 up to 1.6 V at scan rates of 25, 50, 75, 100, 150, 175, 200, 300, 400 and 500  $\text{mV s}^{-1}$ . *Insert* - Current ( $I$ ) of the anodic ( $I_{pa}$ ) and cathodic ( $I_{pc}$ ) processes vs. square root of the potential scan rate ( $v$ ).

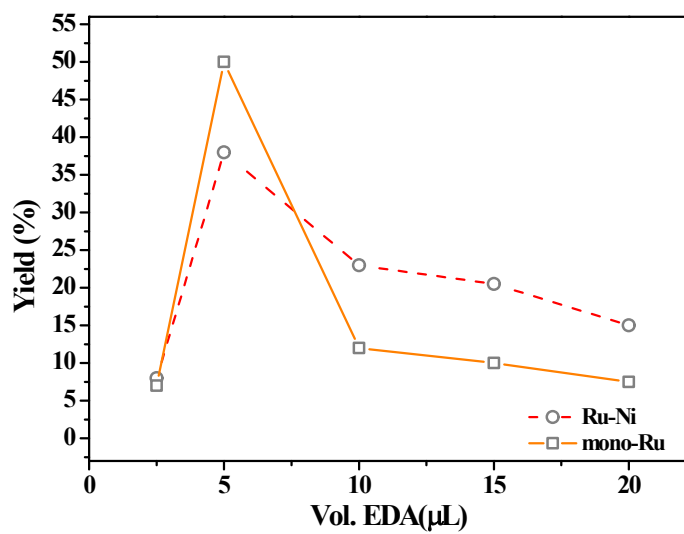

**Fig S10.** Dependence of yield as a function of the volume of EDA molar ratio for ROMP of NBE with **mono-Ru** and **Ru-Ni**;  $[NBE]/[Ru] = 5000$  in  $CHCl_3$  for 60 min.

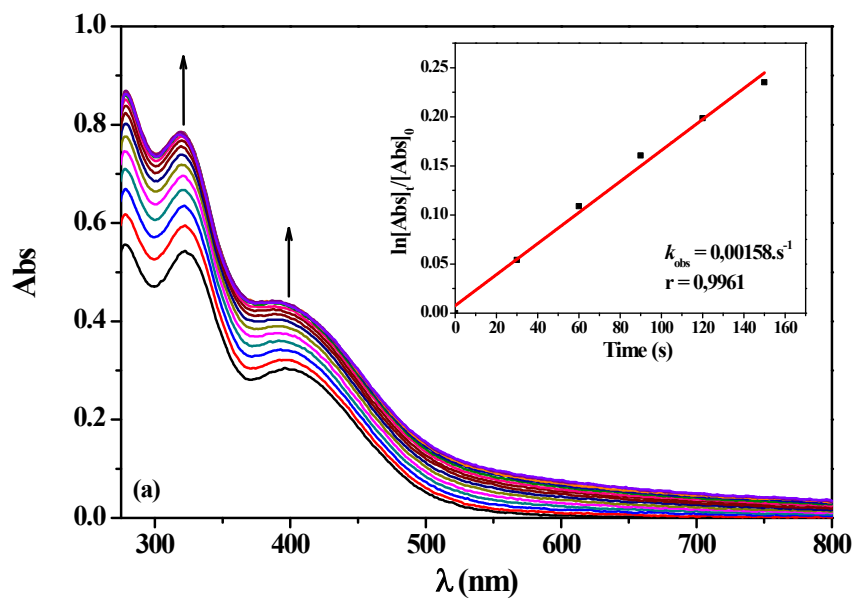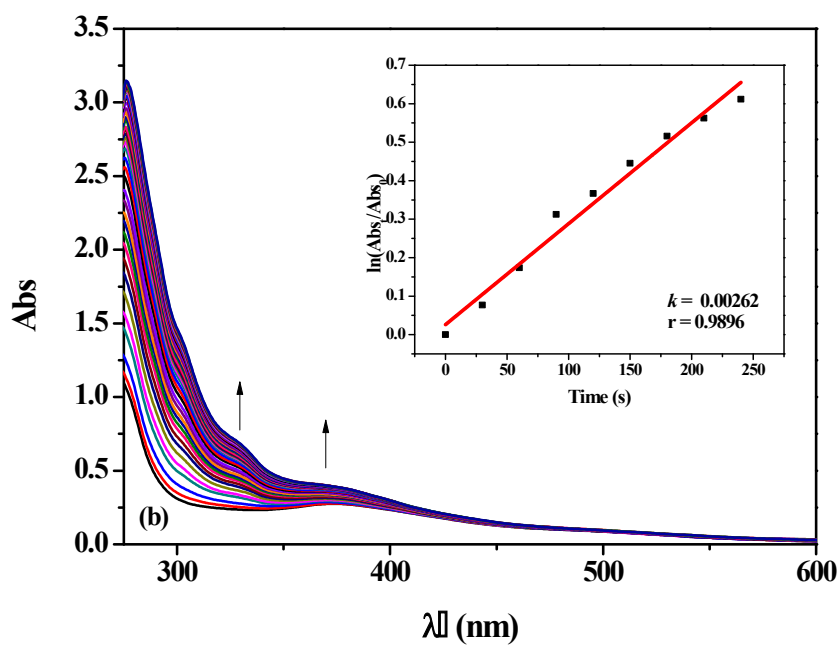

**Fig. S11.** Kinetic study of **mono-Ru** (a) and **Ru-Ni** (b) in presence of EDA monitored by electronic spectroscopy every 30 seconds and (*insert*) dependence of  $\ln(\text{Abs}_t/\text{Abs}_0)$  as a function of time at 316 nm.  $[\text{Ru}] = 1.0 \cdot 10^{-5} \text{ M}$ ;  $[\text{EDA}] = 1.26 \cdot 10^{-5} \text{ mol L}^{-1}$  in  $\text{CHCl}_3$  and 25 °C.



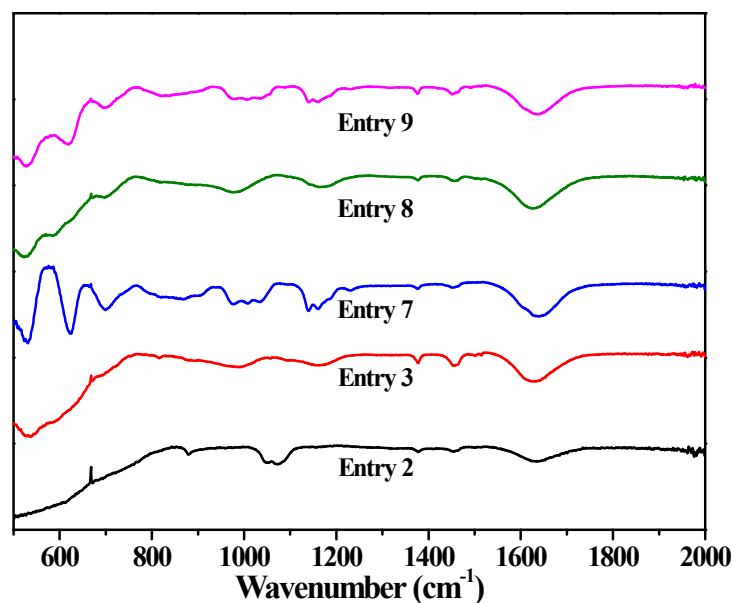

**Fig. S12** FTIR spectra of polyethylene obtained from **Ru-Ni**.

**Table S1** Peaks detected in the positive ion MALDI-TOF mass spectrum of the **Ru-Ni** and **mono-Ru** complex.

|                | Peak position<br>(m/z) | m/z range       | Peak assignment                                                                     |
|----------------|------------------------|-----------------|-------------------------------------------------------------------------------------|
|                | 311.527                | 309.528-320.575 | $[\text{NiCl}-(\text{N},\text{O})-(4\text{-aminomethyl})]^+$                        |
|                | 522.807                | 521.363-524.617 | $[\text{RuCl}_2(p\text{-cymene})-(\text{N},\text{O})-(4\text{-aminomethyl})]^+$     |
| <b>Ru-Ni</b>   | 572.105                | 570.192-583.116 | $[\text{Ni}(\text{PPh}_3)\text{Cl}(\text{N},\text{O})-(4\text{-aminomethyl})]^+$    |
|                | 706.198                | 696.905-712.930 | $[\text{RuCl}_2(\mu\text{-Schiff-pip})\text{Ni}(\text{PPh}_3)]^+$                   |
|                | 878.014                | 869.625-883.558 | $[\text{Ru-Ni}+\text{H}]^+$                                                         |
|                | 421.622                | 421.622-428.663 | $[\text{Mono-Ru}+\text{H}]^+$                                                       |
| <b>Mono-Ru</b> | 380.540                | 377.521-383.562 | $[\text{RuCl}_2(\eta^6\text{-}p\text{-cymene})(\text{pipNH}_2)]^+\text{-isopropyl}$ |
